# Supplementary material for: Broad HIV-1 inhibition in vitro by vaccine-elicited CD8+ T cells in African adults
Source: PubMed Central journal article supplement (PMC5006719; doi:10.1038/mtm.2016.61), 2016-08-31
Supplement: mtm201661-s1.pdf [file mtm201661-s1.pdf]

**Supplementary Table S1 HLA class I types of trial volunteers**

|         | Volunteer No. | HLA-A    | HLA-B    | HLA-C    |          |          |          |          |
|---------|---------------|----------|----------|----------|----------|----------|----------|----------|
| Group 1 | 1767          | 02:01:01 | 68:02:01 | 07:02:01 | 53:01:01 | 04:01:01 | 15:05:01 |          |
|         | 1772          | 02:02    | 32:01:01 | 15:67    | 58:02    | 06:02:01 | 14:02:03 |          |
|         | 1773          | 02:01:01 | 36:01    | 15:03:01 | 53:01:01 | 02:10    | 04:01:01 |          |
|         | 1777          | 01:01:01 | 23:01:01 | 07:02:01 | 57:01:01 | 07:01:01 | 07:02:01 |          |
|         | 1781          | 30:02:01 | 74:01:01 | 53:01:01 | 58:02    | 06:02:01 |          |          |
|         | 1782          | 03:01:01 | 30:02:01 | 15:10:01 | 35:01:01 | 03:04:02 | 04:01:01 |          |
|         | 1789          | 02:05:01 | 74:01:01 | 58:01:01 | 58:02    | 06:02:01 |          |          |
|         | 1792          | 30:01:01 | 74:01:01 | 42:01:01 | 58:02    | 06:02:01 | 17:01:01 |          |
|         | 1798          | 02:01:01 | 23:01:01 | 53:01:01 | 57:03:01 | 04:01:01 | 08:02:01 |          |
|         | 1822          | 01:01:01 | 68:02:01 | 37:01:01 | 45:01:01 | 06:02:01 |          |          |
|         | 1835          | 23:01:01 | 29:02:01 | 07:02:01 | 45:01:01 | 06:02:01 | 07:02:01 |          |
|         | 1837          | 30:01:01 |          | 15:10:01 | 53:01:01 | 03:04:02 | 04:01:01 |          |
|         | 1843          | 01:01:01 | 68:02:01 | 13:02:01 | 58:01:01 | 03:02:01 | 18:01:01 |          |
|         | 1848          | 02:14    | 34:02:01 | 18:03    | 44:03:01 | 04:01:01 |          |          |
|         | 1850          | 02:01:01 |          | 27:03    | 39:10:01 | 02:02:02 | 12:03:01 |          |
|         | 1855          | 36:01    |          | 15:16:01 | 53:01:01 | 04:01:01 | 16:01:01 |          |
|         | 1857          | 02:01:01 | 23:01:01 | 42:01:01 | 53:01:01 | 04:01:01 | 17:01:01 |          |
|         | 1859          | 03:01:01 | 36:01    | 47:03    | 53:01:01 | 04:01:01 | 07:01:01 |          |
|         | 1866          | 02:01:01 | 33:03:01 | 15:03:01 | 53:01:01 | 02:10    | 04:01:01 |          |
|         | 1867          | 66:01:01 | 68:02:01 | 15:03:01 | 47:03    | 02:10    | 07:01:01 |          |
|         | 1765          | 66:02    | 68:02:01 | 15:10:01 | 58:01:01 | 03:04:02 | 07:01:01 |          |
|         | 1828          | 23:01:01 |          | 15:03:01 |          | 02:10    | 12:03:01 |          |
|         | 1833          | 30:02:01 | 74:01:01 | 08:01:01 | 58:02    | 03:04:01 | 06:02:01 |          |
|         | 1864          | 29:02:01 | 68:02:01 | 07:02:01 | 42:01:01 | 07:02:01 | 17:01:01 |          |
|         | Group 2       | 1762     | 02:01:01 | 68:01:01 | 15:03:01 | 15:17:01 | 02:10    | 17:01:01 |
|         |               | 1768     | 29:02:01 | 34:02:01 | 39:10:01 | 40:12    | 04:04:01 | 12:03:01 |
| 1770    |               | 01:01:01 | 68:02:01 | 47:03    | 81:01:01 | 07:01:01 | 18:01:01 |          |
| 1774    |               | 24:02:01 | 30:01:01 | 18:01:01 | 51:01:01 | 07:01:01 | 16:01:01 |          |
| 1775    |               | 02:05:01 | 30:09    | 15:10:01 | 81:01:01 | 03:04:02 | 04:01:01 |          |
| 1783    |               | 01:01:01 | 74:01:01 | 15:03:01 | 37:01:01 | 02:10    | 06:02:01 |          |
| 1786    |               | 29:02:01 | 31:01:02 | 18:03    | 27:03    | 02:02:02 | 04:01:01 |          |
| 1788    |               | 02:05:01 | 23:01:01 | 27:03    | 49:01:01 | 02:02:02 | 07:01:01 |          |
| 1797    |               | 02:05:01 | 30:01:01 | 42:01:01 | 51:01:01 | 16:01:01 | 17:01:01 |          |
| 1829    |               | 02:01:01 | 30:01:01 | 42:01:01 | 51:01:01 | 16:01:01 | 17:01:01 |          |
| 1832    |               | 26:01:01 | 34:02:01 | 07:05:01 | 53:01:01 | 04:01:01 | 08:02:01 |          |
| 1834    |               | 03:01:01 | 26:01:01 | 15:03:01 | 57:03:01 | 04:01:01 | 07:01:01 |          |
| 1838    |               | 02:05:01 | 68:02:01 | 15:03:01 | 57:03:01 | 02:10    | 07:01:01 |          |
| 1841    |               | 68:02:01 | 74:01:01 | 13:02:01 | 35:01:01 | 04:01:01 | 06:02:01 |          |
| 1851    |               | 01:01:01 | 01:03    | 44:03:02 | 56:01:01 | 01:02:01 | 07:01:01 |          |
| 1853    |               | 29:01:01 | 66:01:01 | 42:01:01 | 58:02    | 06:02:01 | 17:01:01 |          |
| 1858    |               | 01:02    | 29:02:01 | 39:10:01 | 58:01:01 | 03:02:01 | 12:03:01 |          |
| 1863    |               | 68:01:01 | 68:02:01 | 14:02:01 | 15:10:01 | 03:04:02 | 08:02:01 |          |
| 1868    |               | 03:01:01 | 66:01:01 | 15:03:01 | 58:02    | 06:02:01 |          |          |
| 1869    |               | 68:02:01 |          | 07:02:01 |          | 07:02:01 |          |          |
| 1780    |               | 01:03    | 66:01:01 | 57:03:01 | 58:02    | 06:02:01 | 07:01:01 |          |
| 1795    |               | 30:02:01 | 32:01:01 | 14:02:01 | 58:01:01 | 06:02:01 | 08:02:01 |          |
| 1846    |               | 01:01:01 | 02:01:01 | 18:01:01 | 37:01:01 | 06:02:01 | 07:04:01 |          |
| 1862    |               | 02:01:01 | 02:05:01 | 35:01:01 | 42:01:01 | 04:01:01 | 17:01:01 |          |

**Supplementary Table S1** Continued.

|         | Volunteer<br>No. | HLA-A    | HLA-B    | HLA-C    |          |          |          |
|---------|------------------|----------|----------|----------|----------|----------|----------|
| Group 3 | 1764             | 29:15    | 30:04:01 | 45:01:01 | 58:01:01 | 06:02:01 | 16:01:01 |
|         | 1766             | 02:01:01 | 03:01:01 | 15:03:01 | 42:01:01 | 02:10    | 17:01:01 |
|         | 1769             | 02:01:01 | 68:02:01 | 07:02:01 | 15:03:01 | 02:10    | 07:02:01 |
|         | 1771             | 02:14    | 23:01:01 | 14:02:01 | 18:03    | 04:01:01 | 08:02:01 |
|         | 1778             | 66:01:01 | 74:01:01 | 45:01:01 | 58:02    | 06:02:01 |          |
|         | 1784             | 03:01:01 | 74:01:01 | 08:01:01 | 51:01:01 | 04:01:01 | 07:01:01 |
|         | 1790             | 02:05:01 | 30:02:01 | 14:02:01 | 58:01:01 | 06:02:01 | 08:02:01 |
|         | 1791             | 02:01:01 | 68:02:01 | 07:02:01 | 27:03    | 02:02:02 | 07:02:01 |
|         | 1823             | 02:05:01 | 36:01    | 27:03    | 53:01:01 | 02:02:02 | 04:01:01 |
|         | 1824             | 01:03    | 02:02    | 58:01:01 | 58:02    | 03:02:01 | 06:02:01 |
|         | 1831             | 01:09    | 29:02:01 | 15:17:01 | 44:15    | 04:07    | 17:01:01 |
|         | 1836             | 23:01:01 | 33:01:01 | 15:10:01 | 45:01:01 | 03:04:02 | 06:02:01 |
|         | 1840             | 26:01:01 | 68:02:01 | 53:01:01 | 81:01:01 | 04:01:01 |          |
|         | 1842             | 02:01:01 | 29:02:01 | 42:01:01 | 53:01:01 | 06:02:01 | 17:01:01 |
|         | 1849             | 01:01:01 | 02:01:01 | 15:03:01 | 27:26    | 02:02:02 | 02:10    |
|         | 1852             | 23:01:01 | 66:01:01 | 08:01:01 | 44:03:01 | 04:01:01 | 07:01:01 |
|         | 1860             | 02:02    | 29:02:01 | 42:01:01 | 57:03:01 | 07:01:01 | 17:01:01 |
|         | 1865             | 01:01:01 | 68:02:01 | 13:02:01 | 47:01:01 | 06:02:01 |          |
|         | 1870             | 01:01:01 | 03:01:01 | 41:01    | 58:02    | 06:02:01 | 07:01:01 |
|         | 1871             | 02:14    | 68:02:01 | 07:02:01 | 15:03:01 | 07:01:01 | 07:02:01 |
|         | 1776             | 30:02:01 | 36:01    | 15:03:01 | 15:16:01 | 02:10    | 16:01:01 |
|         | 1821             | 30:04:01 | 68:02:01 | 45:01:01 | 47:03    | 07:01:01 | 08:04:01 |
|         | 1847             | 29:02:01 | 32:01:01 | 42:01:01 | 58:02    | 04:01:01 | 17:01:01 |
|         | 1861             | 01:01:01 |          | 45:01:01 | 49:01:01 | 06:02:01 |          |

**Supplementary Table S2 Identified and confirmed stimulatory 15-mer peptides derived from HIVconsV using frozen unexpanded PBMC samples<sup>a</sup>**

| Gr | ID   | Week | Peptide No. | Protein of Origin/Clade | Sequence                      | Magnitude (SFU/10 <sup>6</sup> PBMC) |
|----|------|------|-------------|-------------------------|-------------------------------|--------------------------------------|
| 1  | 1767 | 10   | HIVCON 182  | ENV/D                   | LGAAGSTMGAASMTL               | 367                                  |
| 1  | 1777 | 10   | HIVCON 88   | POL/C                   | GSPAIFQSSMTKILE               | 186                                  |
| 1  | 1781 | 10   | HIVCON 163  | POL/B                   | KTAVQMAVFIHNFKR               | 57                                   |
| 1  | 1781 | 10   | HIVCON 164  | POL/B                   | VQMAVFIHNFKRKGGI              | 77                                   |
| 1  | 1789 | 10   | HIVCON 160  | POL/B                   | IIGQVRDQAEHLKTA               | 194                                  |
| 1  | 1789 | 10   | HIVCON 164  | POL/B                   | VQMAVFIHNFKRKGGI              | 101                                  |
| 1  | 1789 | 10   | HIVCON 165  | POL/B                   | FIHNFKRKGIGGYS                | 51                                   |
| 1  | 1850 | 10   | HIVCON 15   | GAG/D                   | IYKRWILGLNKIVR                | 1980                                 |
| 1  | 1864 | 10   | HIVCON 159  | POL/B                   | ELKKIIGQVRDQAEH               | 118                                  |
| 1  | 1864 | 10   | HIVCON 163  | POL/B                   | KTAVQMAVFIHNFKR               | 58                                   |
| 1  | 1864 | 10   | HIVCON 164  | POL/B                   | VQMAVFIHNFKRKGGI              | 72                                   |
| 1  | 1864 | 10   | HIVCON 165  | POL/B                   | FIHNFKRKGIGGYS                | 782                                  |
| 2  | 1762 | 22   | HIVCON 113  | POL/A-B                 | SKDLIAEIQ-YWQATW <sup>b</sup> | 178                                  |
| 2  | 1774 | 22   | HIVCON 82   | POL/C                   | TIPSINNETPGIRYQ               | 73                                   |
| 2  | 1774 | 22   | HIVCON 83   | POL/C                   | INNETPGIRYQYNVL               | 143                                  |
| 2  | 1788 | 22   | HIVCON 15   | GAG/D                   | IYKRWILGLNKIVR                | 190                                  |
| 2  | 1786 | 22   | HIVCON 15   | GAG/D                   | IYKRWILGLNKIVR                | 536                                  |
| 2  | 1832 | 22   | HIVCON 87   | POL/C                   | KQGWKGSPAIFQSSMT              | 550                                  |
| 2  | 1832 | 22   | HIVCON 88   | POL/C                   | GSPAIFQSSMTKILE               | 585                                  |
| 2  | 1834 | 22   | HIVCON 1    | GAG/C                   | MEEKAFSPEVIPMFT               | 250                                  |
| 2  | 1834 | 22   | HIVCON 77   | POL/C                   | VGDAYFSVPLDEGFR               | 463                                  |
| 2  | 1834 | 22   | HIVCON 78   | POL/C                   | YFSVPLDEGFRKYTA               | 940                                  |
| 2  | 1834 | 22   | HIVCON 79   | POL/C                   | PLDEGFRKYTAFTIP               | 53                                   |
| 2  | 1841 | 22   | HIVCON 55   | POL/B                   | GPENPYNTPVFAIKK               | 411                                  |
| 2  | 1841 | 22   | HIVCON 78   | POL/C                   | YFSVPLDEGFRKYTA               | 1274                                 |
| 2  | 1841 | 22   | HIVCON 79   | POL/C                   | PLDEGFRKYTAFTIP               | 371                                  |
| 2  | 1841 | 22   | HIVCON 163  | POL/B                   | KTAVQMAVFIHNFKR               | 291                                  |
| 2  | 1841 | 22   | HIVCON 164  | POL/B                   | VQMAVFIHNFKRKGGI              | 258                                  |
| 2  | 1841 | 22   | HIVCON 177  | POL/C                   | RKAKIIRDYGKQMAG               | 98                                   |
| 2  | 1841 | 22   | HIVCON 178  | POL/C                   | IIRDYGKQMAGADCV               | 824                                  |
| 2  | 1863 | 22   | HIVCON 13   | GAG/C-D                 | EEAAEWDR-IYKRWII <sup>b</sup> | 80                                   |
| 2  | 1863 | 22   | HIVCON 62   | POL/B                   | GPENPYNTPVFAIKK               | 1136                                 |
| 2  | 1863 | 22   | HIVCON 63   | POL/B                   | PYNTPVFAIKKKDST               | 933                                  |
| 3  | 1764 | 22   | HIVCON 12'  | GAG/C                   | DTINEEAAEWDR                  | 340                                  |
| 3  | 1766 | 22   | HIVCON 176  | POL/C                   | VVPRRKAKIIRDYGK               | 344                                  |
| 3  | 1766 | 22   | HIVCON 177  | POL/C                   | RKAKIIRDYGKQMAG               | 79                                   |
| 3  | 1771 | 22   | HIVCON 1    | GAG/C                   | MEEKAFSPEVIPMFT               | 61                                   |
| 3  | 1771 | 22   | HIVCON 154  | POL/A                   | IPAETGQETAYFLLK               | 161                                  |
| 3  | 1771 | 22   | HIVCON 163  | POL/B                   | KTAVQMAVFIHNFKR               | 128                                  |
| 3  | 1771 | 22   | HIVCON 164  | POL/B                   | VQMAVFIHNFKRKGGI              | 106                                  |
| 3  | 1784 | 22   | HIVCON 88   | POL/C                   | GSPAIFQSSMTKILE               | 376                                  |
| 3  | 1784 | 22   | HIVCON 89   | POL/C                   | IFQSSMTKILEPFRA               | 79                                   |
| 3  | 1784 | 22   | HIVCON 163  | POL/B                   | KTAVQMAVFIHNFKR               | 456                                  |
| 3  | 1784 | 22   | HIVCON 164  | POL/B                   | VQMAVFIHNFKRKGGI              | 609                                  |
| 3  | 1790 | 22   | HIVCON 137' | POL/D                   | KVLFLDGIDKAQ                  | 168                                  |
| 3  | 1790 | 22   | HIVCON 137  | POL/D-A                 | KVLFLDGIDKAQ-AKE <sup>b</sup> | 145                                  |
| 3  | 1790 | 22   | HIVCON 136  | POL/D                   | SQGIRKVLFLDGIDKA              | 137                                  |
| 3  | 1836 | 22   | HIVCON 40   | POL/B                   | ILIEICGHKAIGTVL               | 223                                  |
| 3  | 1836 | 22   | HIVCON 41   | POL/B                   | ICGHKAIGTVLVGPT               | 163                                  |
| 3  | 1836 | 22   | HIVCON 174  | POL/C                   | IQDNSDIKVPRRKA                | 318                                  |

a - For this analysis, frozen samples from week 10 for Group 1 and from week 22 for Groups 2 and 3 were used; b - Hyphen indicates a junction between two adjacent regions.

GRIN – Full-length proteins of clade A Gag, RT, Integrase and Nef  
HIVconsv – Conserved regions of alternating clade consensus

MAARASILSGGKLDWEKIRLRPGGKKKYRLKHLVWASRELDRFALNPSLLETTEGCQQIMNQLQP  
-----

AVKTGTEEIKSLFNTVATLYCVHQRIDVKDTKEALDKIEEIQNKSKQKTQQAADTDGSSKVSQNY  
-----

PIIQNAQGQMIHQNLSPRTLNAWVKVIEEKAFSPEVIPMFSALSEGATPQDLNVMLNIVGGHQAM  
-----E EKAFSPEVIPMF TALSEGATPQDLN TMLN TVGGHQAM

QMLKDTINEEAAEWDR LHPVQAGPIPPGQIREPRGSDIAGTTSTPQEQ LQWMTGNPPIPVGNIYKR  
QMLKDTINEEAAEWDR-----IYKR

WIILGLNKIVRMYS PVSILDIKQGPKEPFRDYVDRFFKALRAEQATQDVKGWMTETLLVQANANPDC  
WIILGLNKIVRMYS PVSILDIRQGPKEPFRDYVDRF-----

KSILKALGSGATLEEMMTACQGVGGPGHKARVLAEAMSQAQQTNI MMQRGNFRGQKRIKCFNCGKE  
-----

GHLARNCRAPRKKKGCWKCGKEGHQMKDCTERQANFLGKIWPSSKGRPGNFPPQSRPEPTAPPAELFG  
---ARNCRAPRKKKGCWKCGKEGHQMKDCTERQANFLGKIWPS-----

MGEGLASLPKQEQKDREQVPPLVSLKSLFGNDPLSQGS-----  
-----RWKPKMIGGIGGF IKVRQYDQ

-----PISPIETVPVTLKPGMDGPKVKQWPLTE  
ILIEICGHKAIGTVLVGPTPVNI IGRNLLTQIGCTLNFPISPIETVPVTLKPGMDGPKVKQWPLTE

EKIKALTEICTEMEKEGKISKIGPENPYNTPIFAIKKKDSTKWRKLVDFRELNKRTQDFWEVQLGI  
EKIKALVEICTEMEKEGKISKIGPENPYNTPVFAIKKKDSTKWRKLVDFRELNKRTQDFWEVQLGI

PHPAGLKKKKSVTVLDVGDAYFSVPLDENFRKYTAFTIPSTNNETPGVRYQYNVLPQGWKGS PAIF  
PHPAGLKKKKSVTVLDVGDAYFSVPLDEGFRKYTAFTIP SINNETPGIRYQYNVLPQGWKGS PAIF

QSSMTKILEPFRSKNPEII IYQYMAALYVGS DLEIGQHRTKIEELRAHLLSWGF TTPDKKHQKEPP  
QSSMTKILEPFRAQNP EIVYQYMD DLYVGS DLEIGQHR-----

FLWMGYELHPDKWTVQPIMLPDKESWTVNDIQKLVGKLNWASQIYAGIKVKQLCRLLRGAKALTDI  
-----

VTLTEEALELELAENREILKDPVHGVYYDPSKDLVAEIQKQGDQWTYQIYQEPFKNLKTGKYARKR  
--LTEEALELELAENREILKDPVHGVYYDPSKDLIAEIQ-----

SAHTNDVRQLAEVVQKVAMESIVIWGKTPKFKLPIQKETWETWMDYWQATWIPEWEFVNT PPLVK  
-----YWQATWIPEWEFVNT PPLVK

Supplementary Figure S1

LWYQLEKDPILGAETFYVDGAANRETKLGKAGYVTDGRGRQKVSLTETTNQKTELHAILLALQDSG  
 LWYQLEK-----  
  
 SEVNIIVTDSQYALGIIQAQPDRSESELVNQIIIEKLIIGKDKIYLSWVPAHKGIGGNEQVDKLVSSGI  
 -----WVPAHKGIGGNEQVDKLVSSGI  
  
 RKVLFLDGIDKAQEDHERYHSNWRMTASDFNLPPIVAKEIVASCDKCQLKGEAMHGQVDCSPGIWQ  
 RKVLFLDGIDKAQ-----AKEIVASCDKCQLKGEAMHGQVDCSPGIWQ  
  
 LACTHLEGKVILVAVHVASGYIEAEVIPAETGQETAYFLLKLAGRWPVKVVHTANGSNFTSAAVKA  
 LDCTHLEGKVILVAVHVASGYIEAEVIPAETGQETAYFLLKLA-----  
  
 ACWWANIQQEFGIPYNPQSOGVVASMNKELKKIIGQVRDQAEHLKTAVQMAVFIHNFKRKGGIGGY  
 -----MNKELKKIIGQVRDQAEHLKTAVQMAVFIHNFKRKGGIGGY  
  
 SAGERIIDIIATDIQTKELQKQITKIQNFRVYYRDSRDPiWKGPAKLLWKGEAVVIQDNNDIKVQ  
 SAGERI-----WKGPAKLLWKGEAVVIQDNNDIKVQ  
  
 PRRKAKILRDYGKQ MAGDDCVAGRQDEDRSMGGKWSKGSIVGWPEIRERMRRAPAAAPGVGAVSQD  
 PRRKAKIIRDYGKQ MAGDCV-----  
  
 LDKHGAI TSSNINNPSCVWLEAQEEEEVGFPVRPQVPLRPMTYKGAFDLSHFLKEKGGLDGLIYSR  
 -----  
  
 KRQEILDLWVYHTQGYFPDWQNYTPGPGVRYPLTFGWCFKLVMEPDEVEKATEGENNSLLHPICQ  
 -----  
  
 HGMDDEEREVLIWKFDSRLALKHRAQELHPEFYKDC\*  
 -----

**Supplementary Figure S1 Alignment of amino acid sequences of the HIVconsv and GRIN proteins.** GRIN was delivered by non-replicating HAdV-35 and HIVconsv was vectored by plasmid pSG2 DNA and non-replicating poxvirus MVA. GRIN contains full-length proteins of HIV-1 clade A Gag (AY253314), RT, integrase (AF457081) and Nef (AF457081). HIVconsv has 776 amino acids derived from 14 highly conserved regions of HIV-1 proteins among clade consensus sequences as of Los Alamos National Laboratory HIV Sequence Database 2004 (red) as described by Létourneau *at el.* PLoS ONE 2017, of which 604 amino acids (78%) are contained in GRIN (black). Within the 604 amino acids, there are 14 amino acid mismatches (blue), i.e. there was overall 97.6% homology within the regions of HIVconsv between the HIVconsv and GRIN proteins.

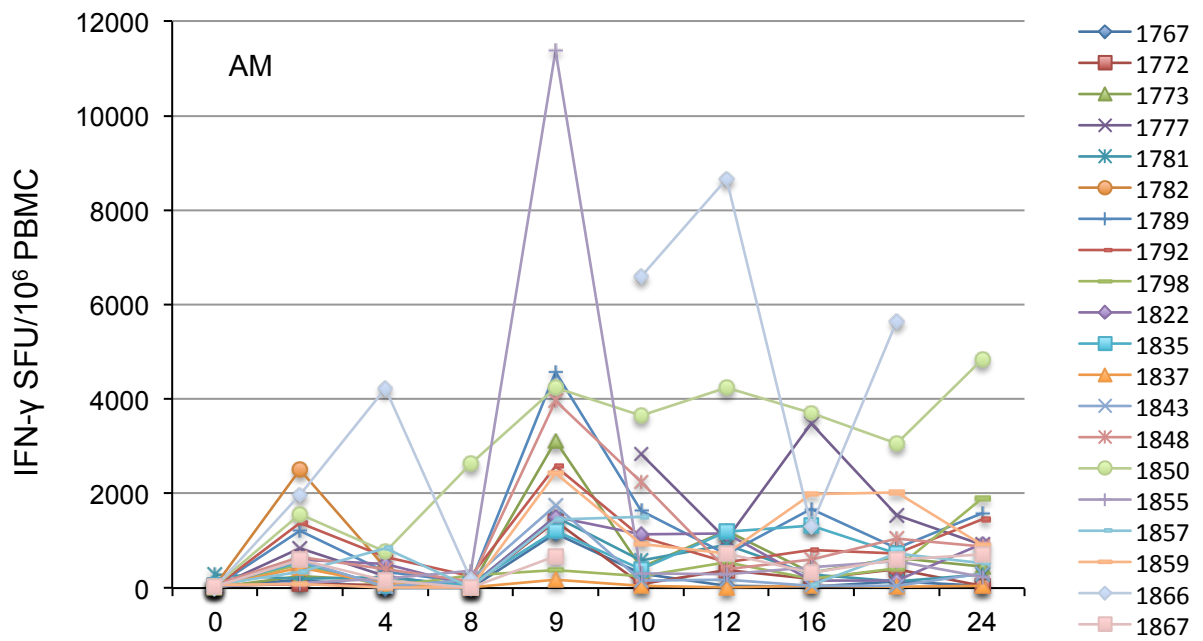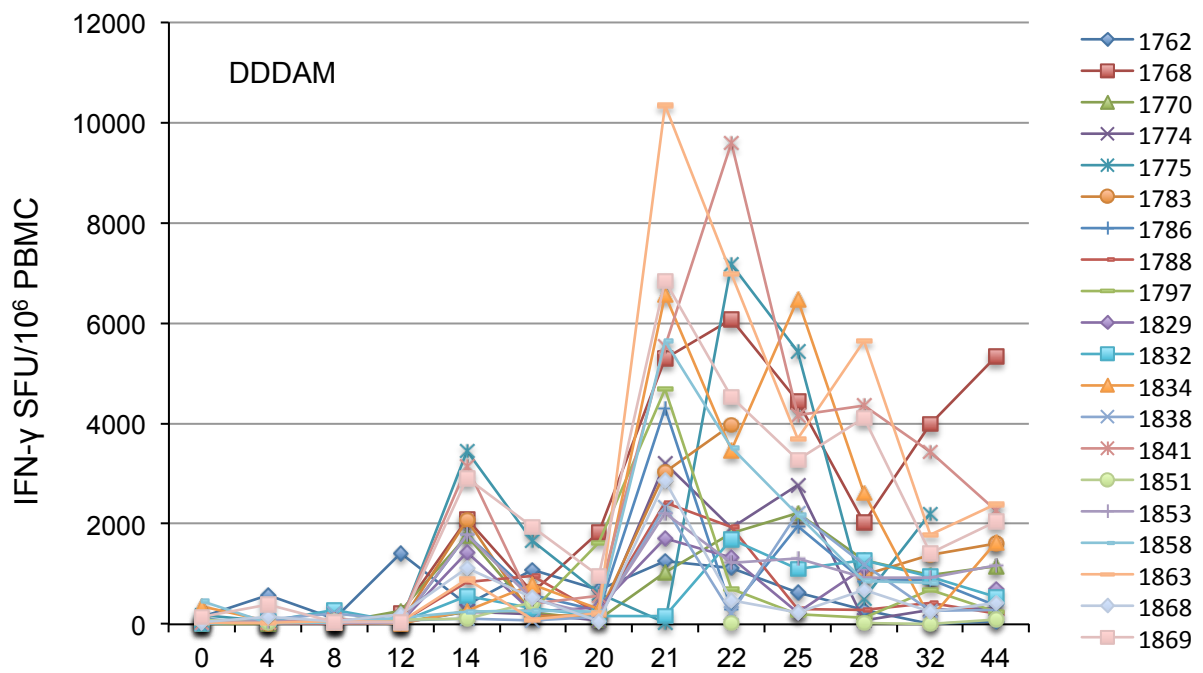

Supplementary Figure S2

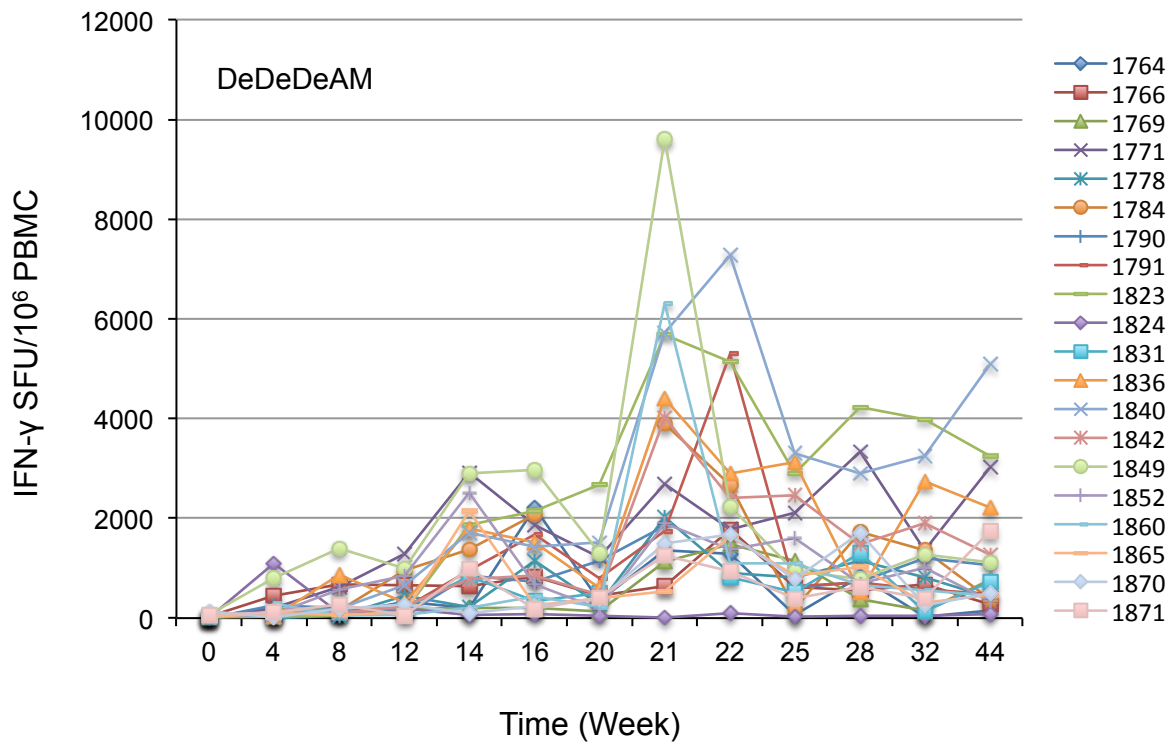

**Supplementary Figure S2 Kinetics of the total fresh IFN- $\gamma$  ELISPOT frequencies of vaccine-elicited T cells shown for individual vaccine recipients. Vaccinations were carried out at weeks 0, 4 and 8 using pSG2.HIVconsV DNA without (D) or with electroporation (De), Ad35-GRIN (A) at week 20 and MVA.HIVconsV (M) at week 25. Placebo responses are not shown.**

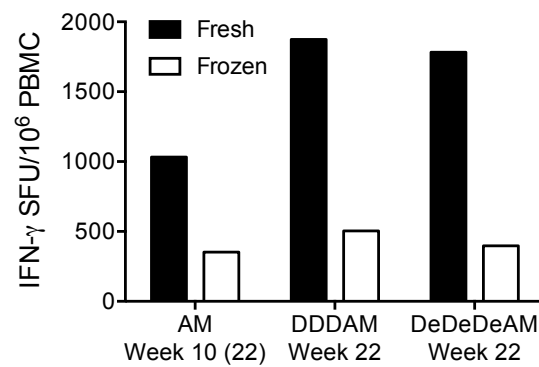

**Supplementary Figure S3 Correlation between frequencies determined in an *ex vivo* IFN- $\gamma$  ELISPOT assay using fresh and frozen PBMC samples.** IFN- $\gamma$  ELISPOT assay on cryopreserved samples was carried out by a reference laboratory (IAVI Human Immunology Laboratory, Imperial College London). The graph compares the frequencies obtained using fresh and frozen samples from 2 weeks after the MVA.HIVconsV administration [for the AM regimen, actual week 10 is shown in [Figure 4a](#) as week 22], showing approximately 3-fold (AM) and 4-fold (DDDAM and DeDeDeAM) higher frequencies using fresh cells.



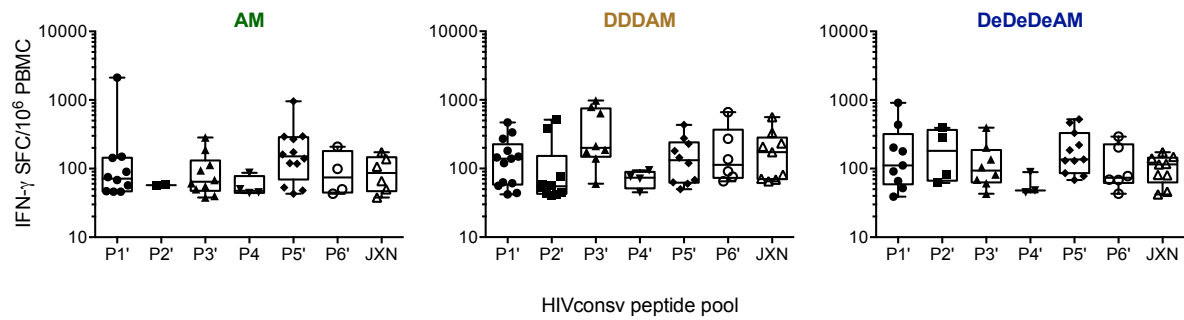

**Supplementary Figure S4 Frozen PBMC *ex vivo* IFN- $\gamma$  ELISPOT assay frequencies of HIVconsv and junctional peptide pool-specific T cells.** Apostrophes next to the peptide pools indicate that these pool do not contain peptides spanning regional junction. Thirteen junctional 15-mer peptides are combined in pool JXN contains.

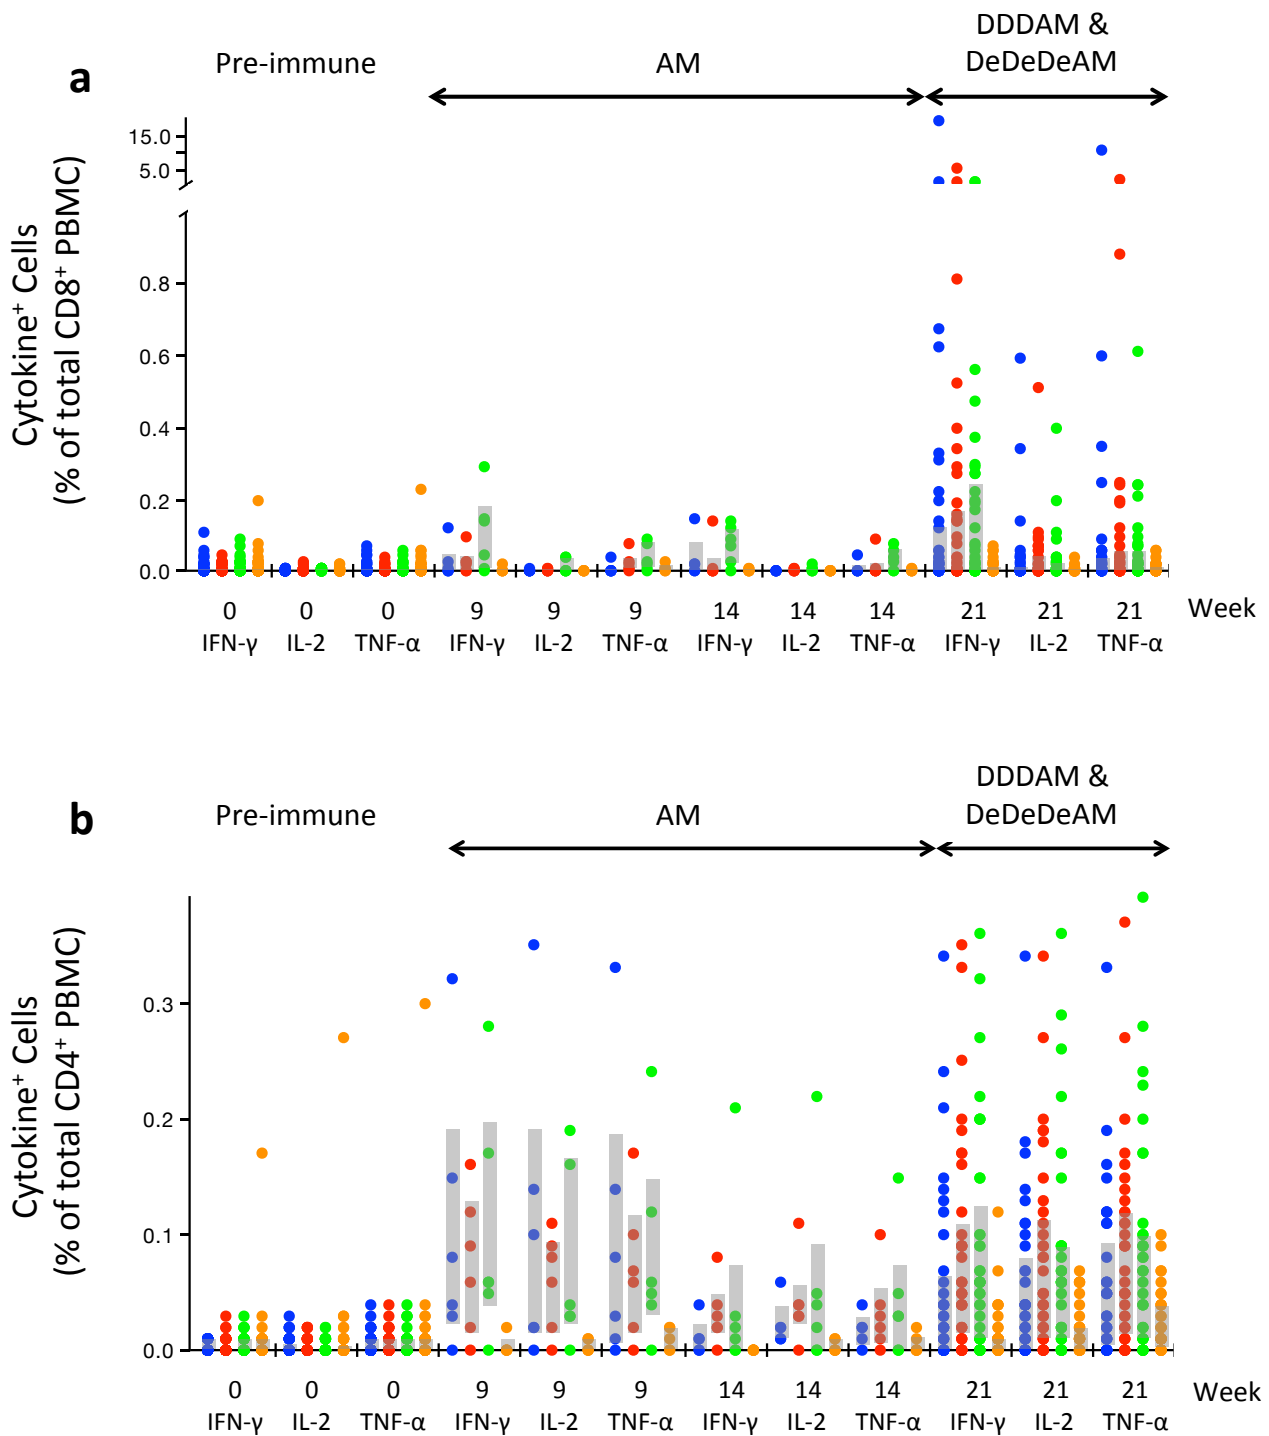

**Supplementary Figure S5 Functional analysis of vaccine-elicited T cells.** Freshly isolated CD8<sup>+</sup> (a) and CD4<sup>+</sup> (b) PBMC were analyzed before vaccination and 1 week after the last vaccine boost administration for production of IFN- $\gamma$ , TNF- $\alpha$  and IL-2 cytokines in an ICS assay. Blue – Gag; Red – Pol1; Green – Pol2; Orange – Vif Env.
